# Supplementary figures and images for: Systematic examination of low-intensity ultrasound parameters on human motor cortex excitability and behavior
Source: eLife journal article supplement (doi:10.7554/elife.54497), 2020-11-25

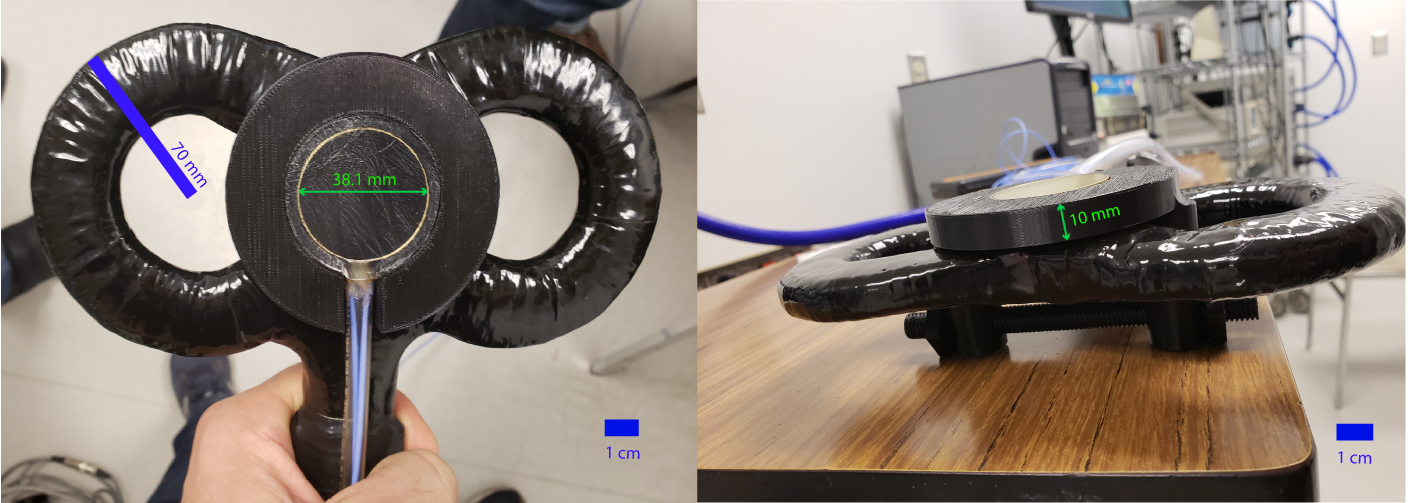

Supplement: supp [file elife-54497-supp-v1.zip › elife_poa_e54497_Figure_1_figure_supplement_1.tif]

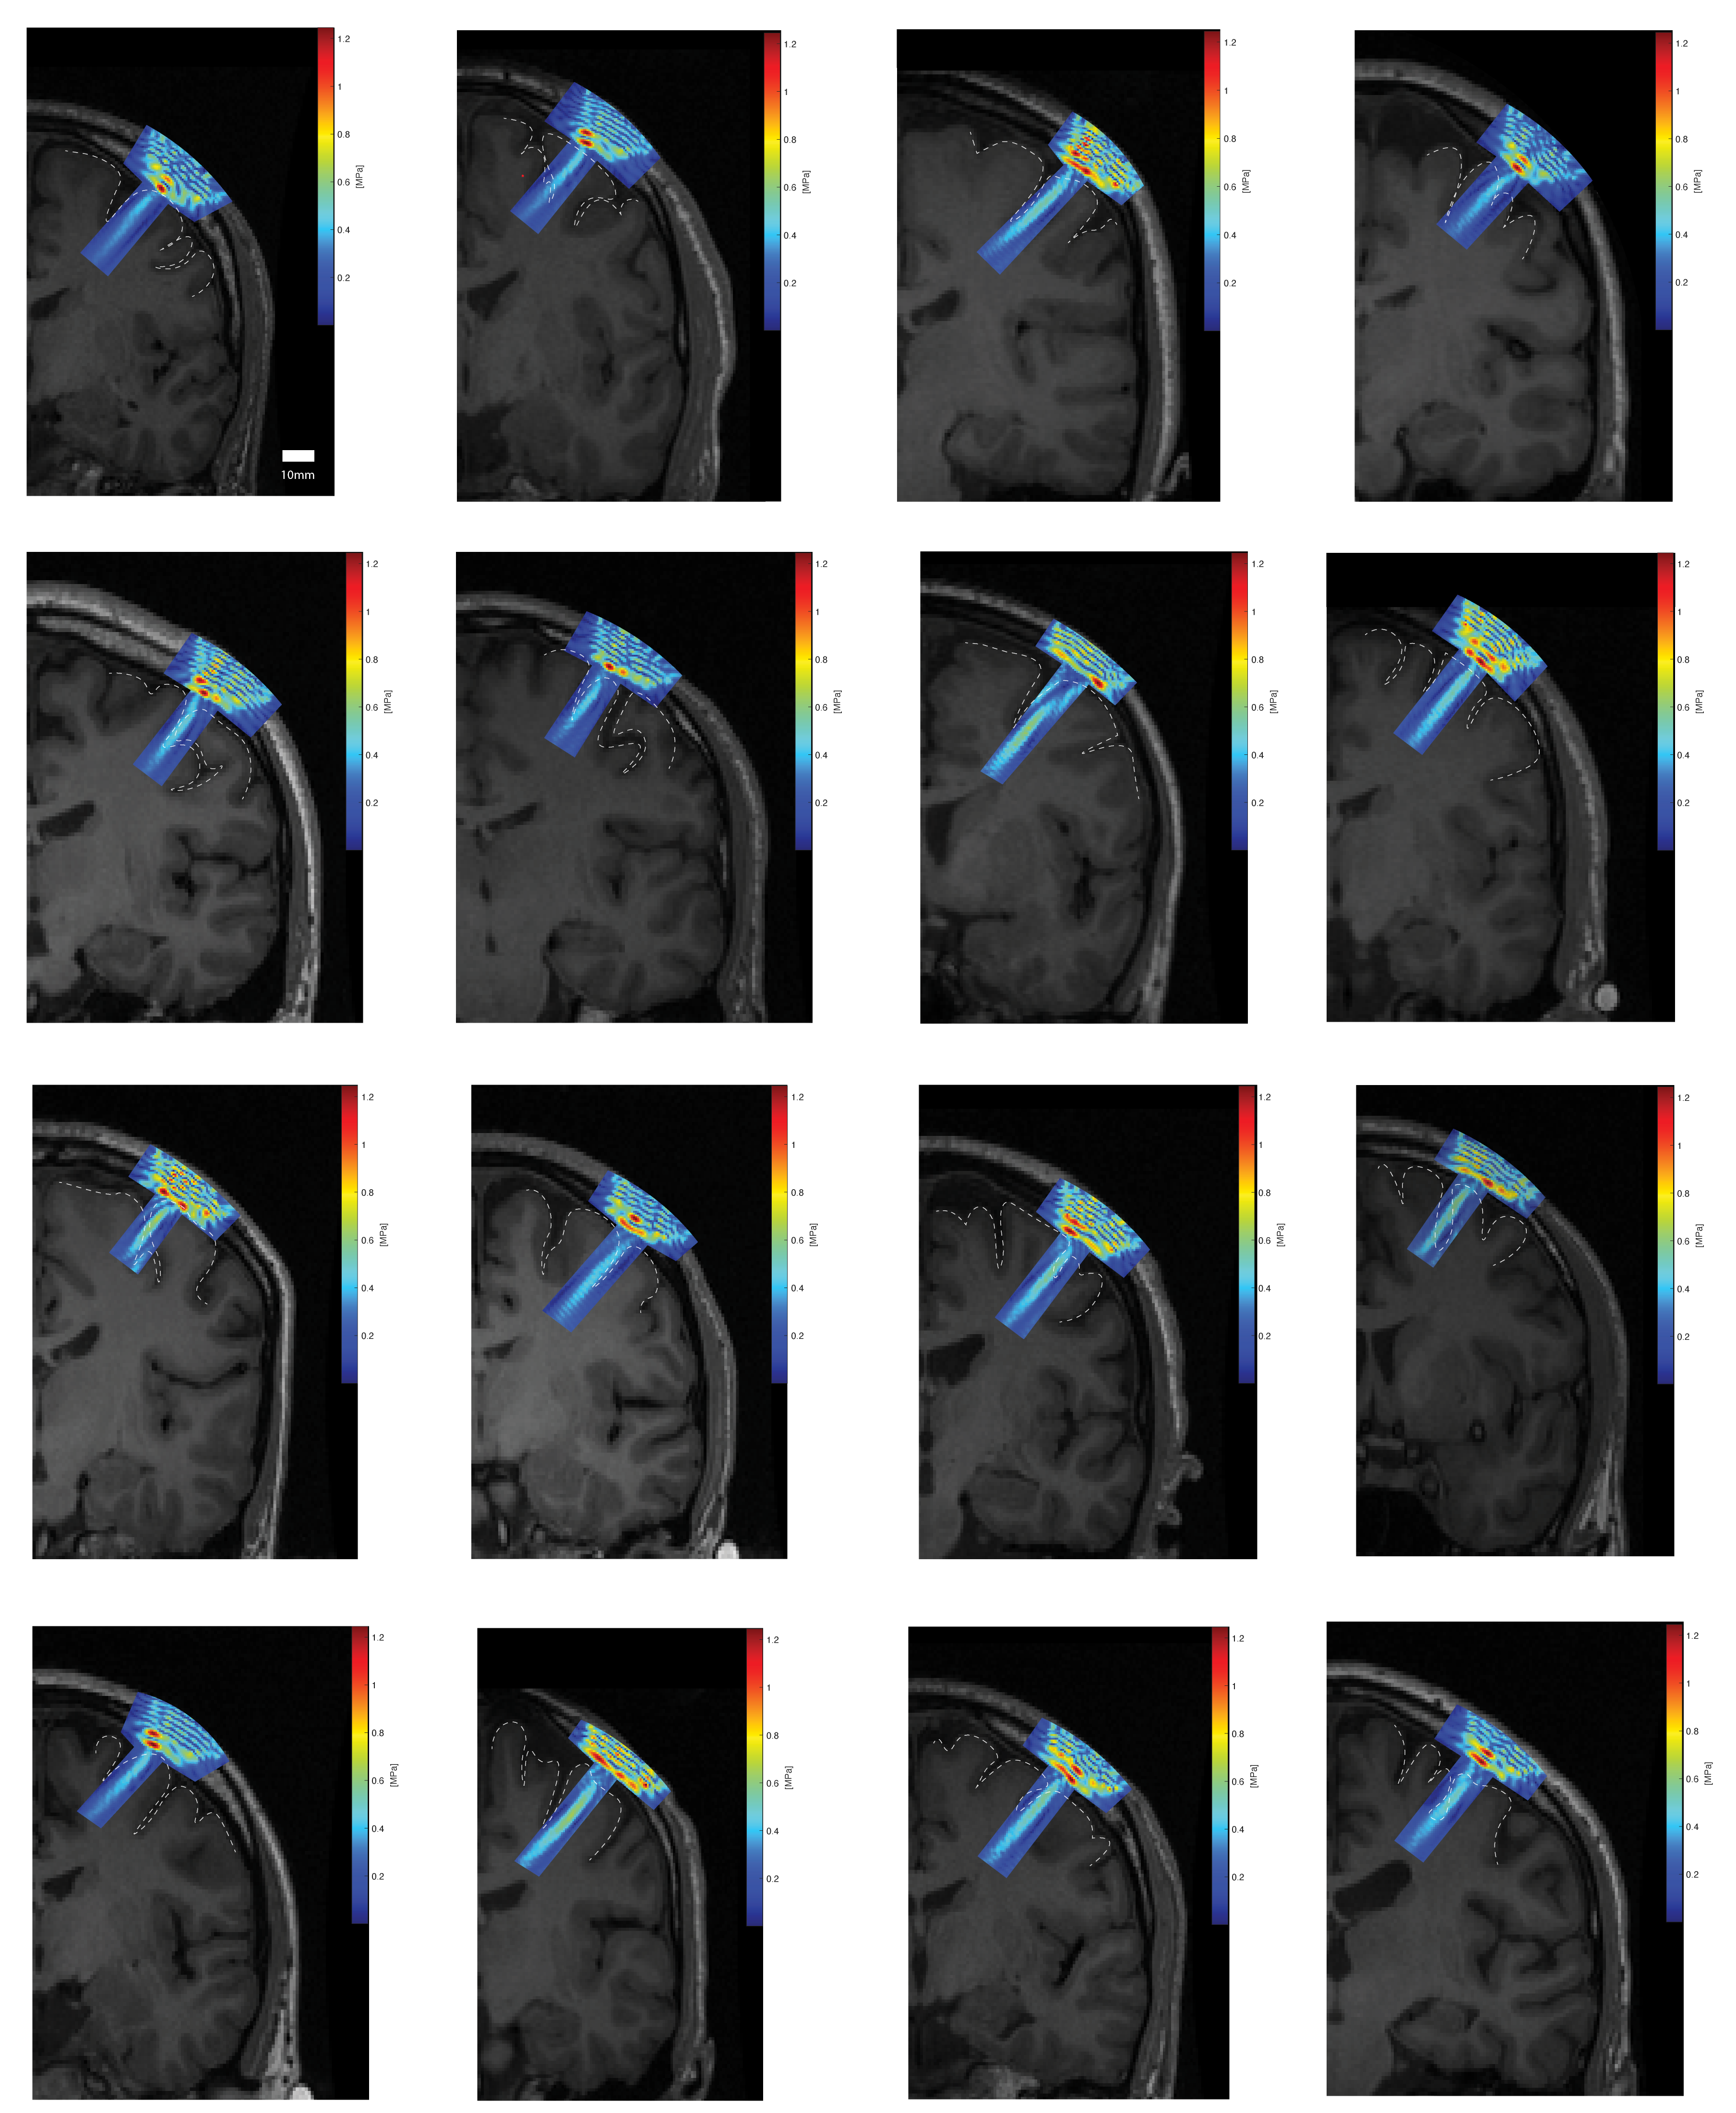

Supplement: supp [file elife-54497-supp-v1.zip › elife_poa_e54497_Figure_2_figure_supplement_1.tif]

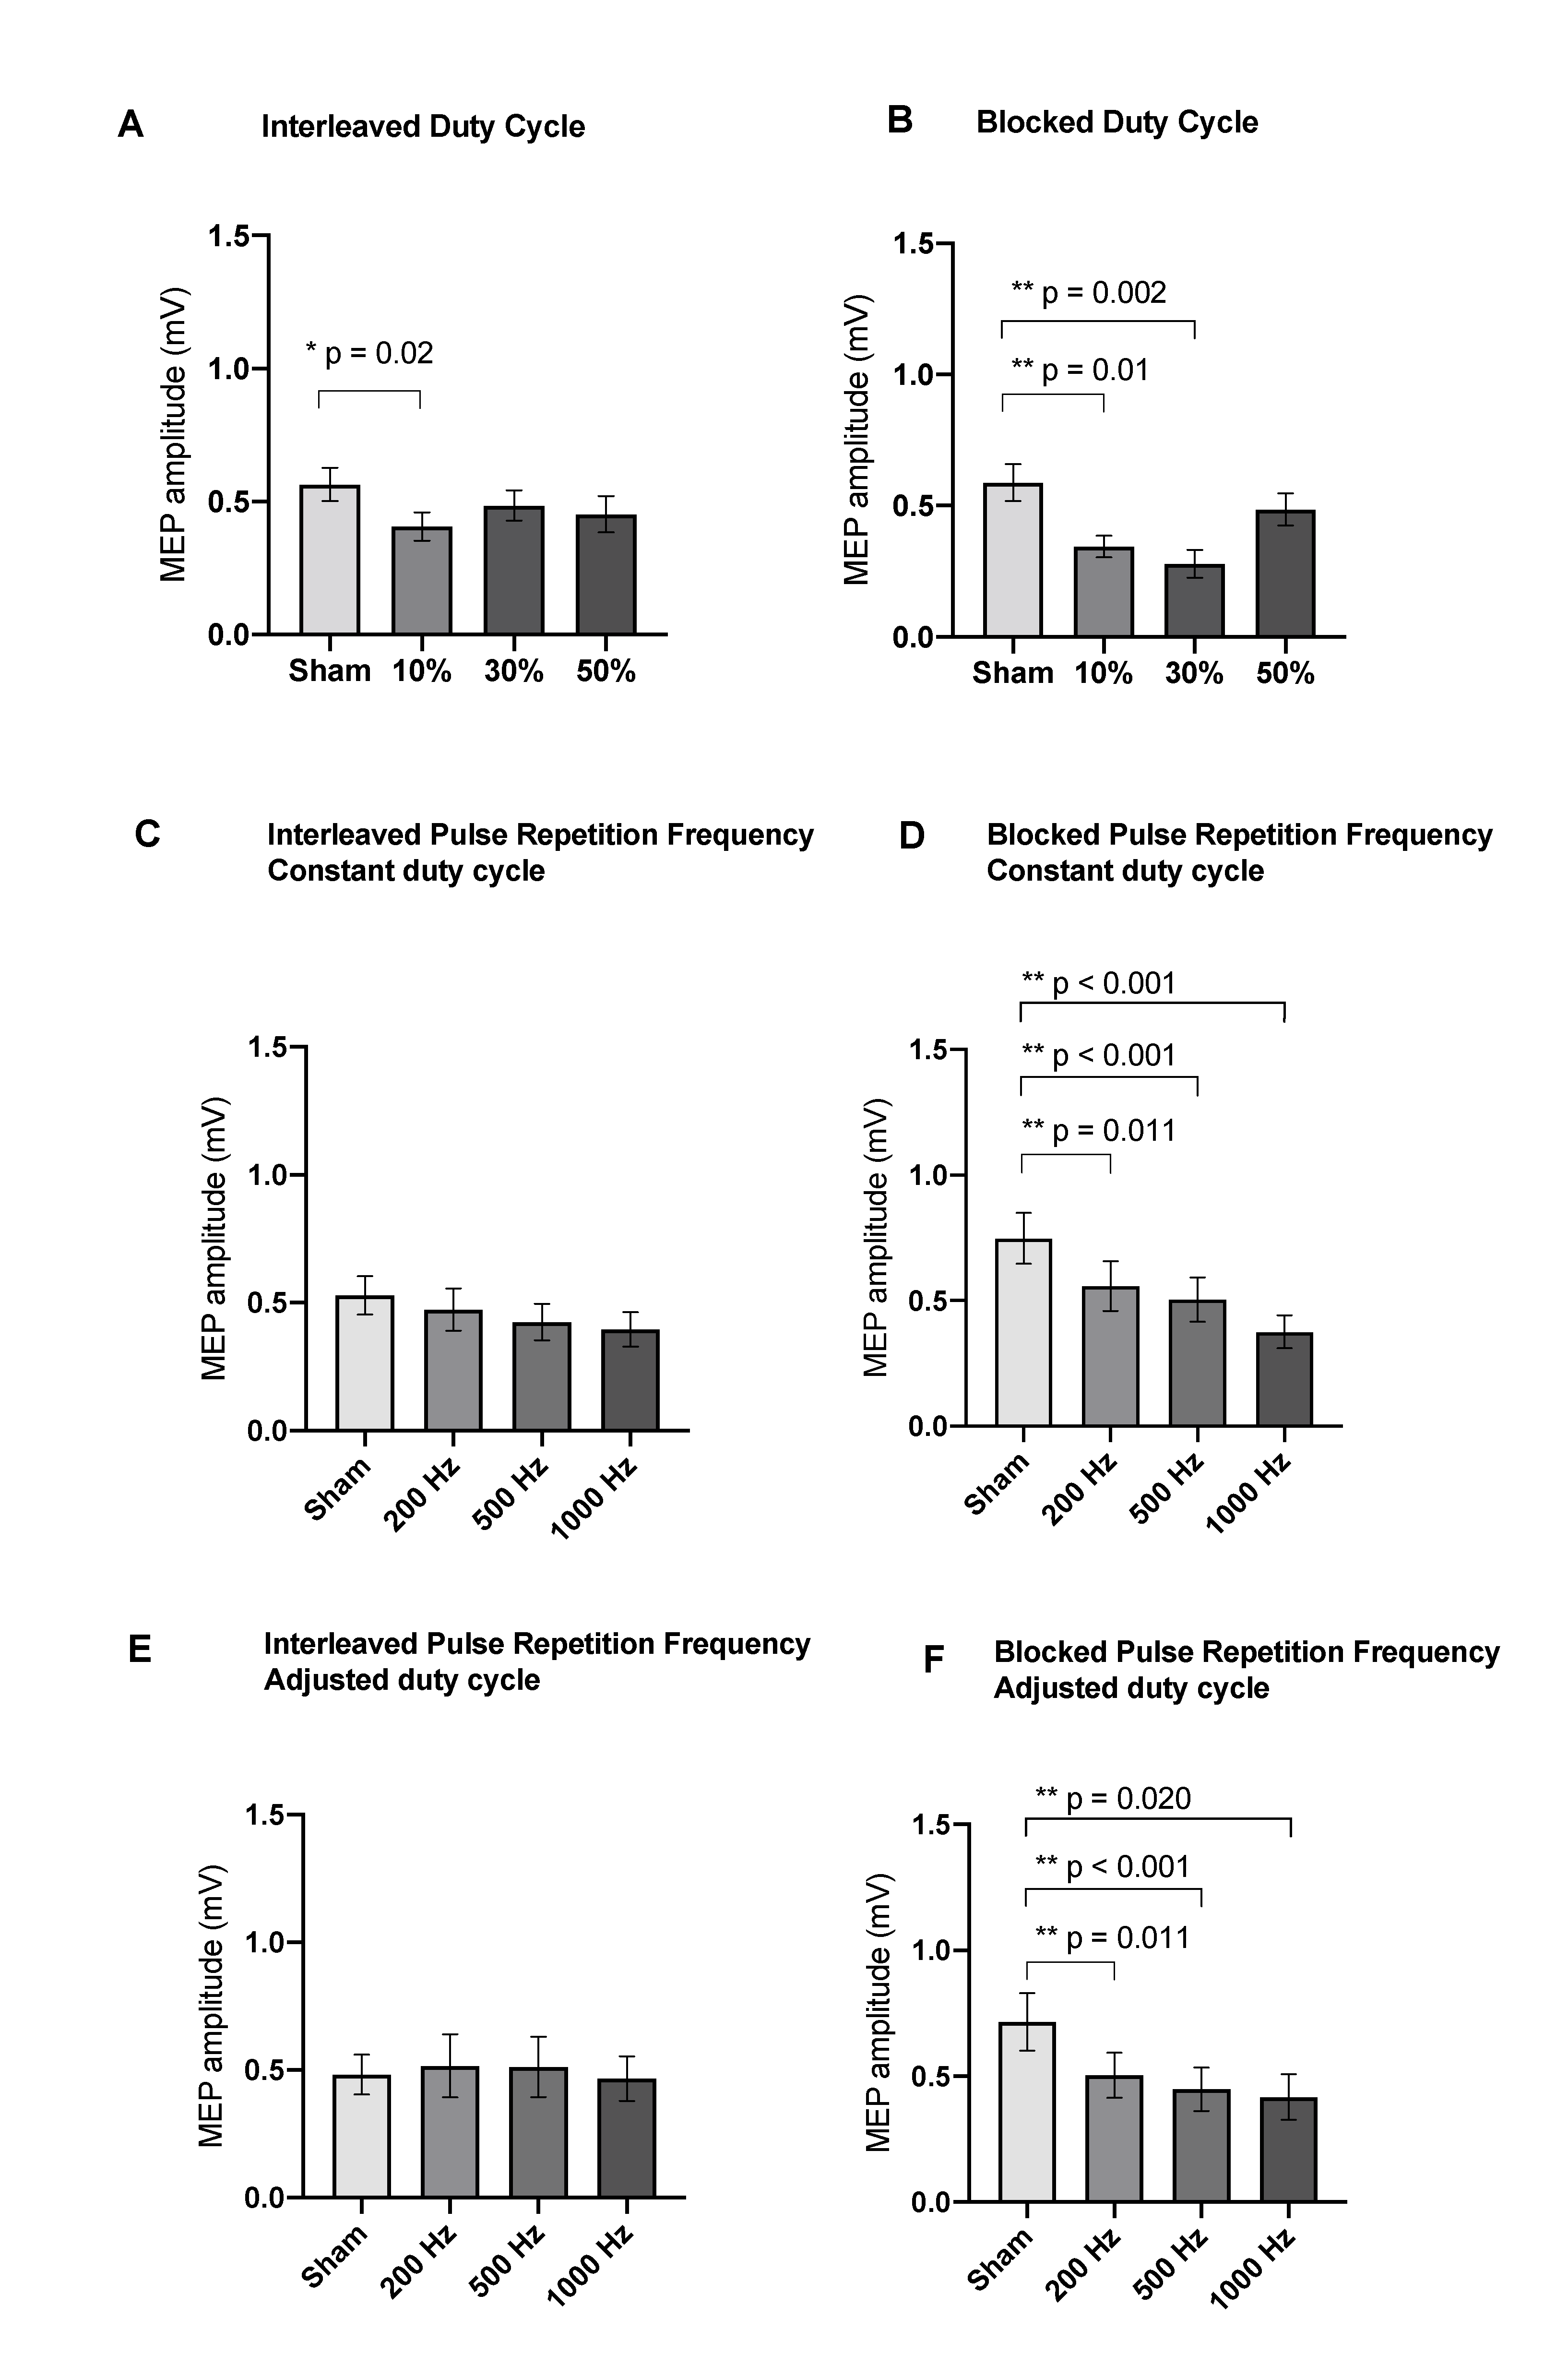

Supplement: supp [file elife-54497-supp-v1.zip › elife_poa_e54497_Figure_5_figure_supplement_1.tif]

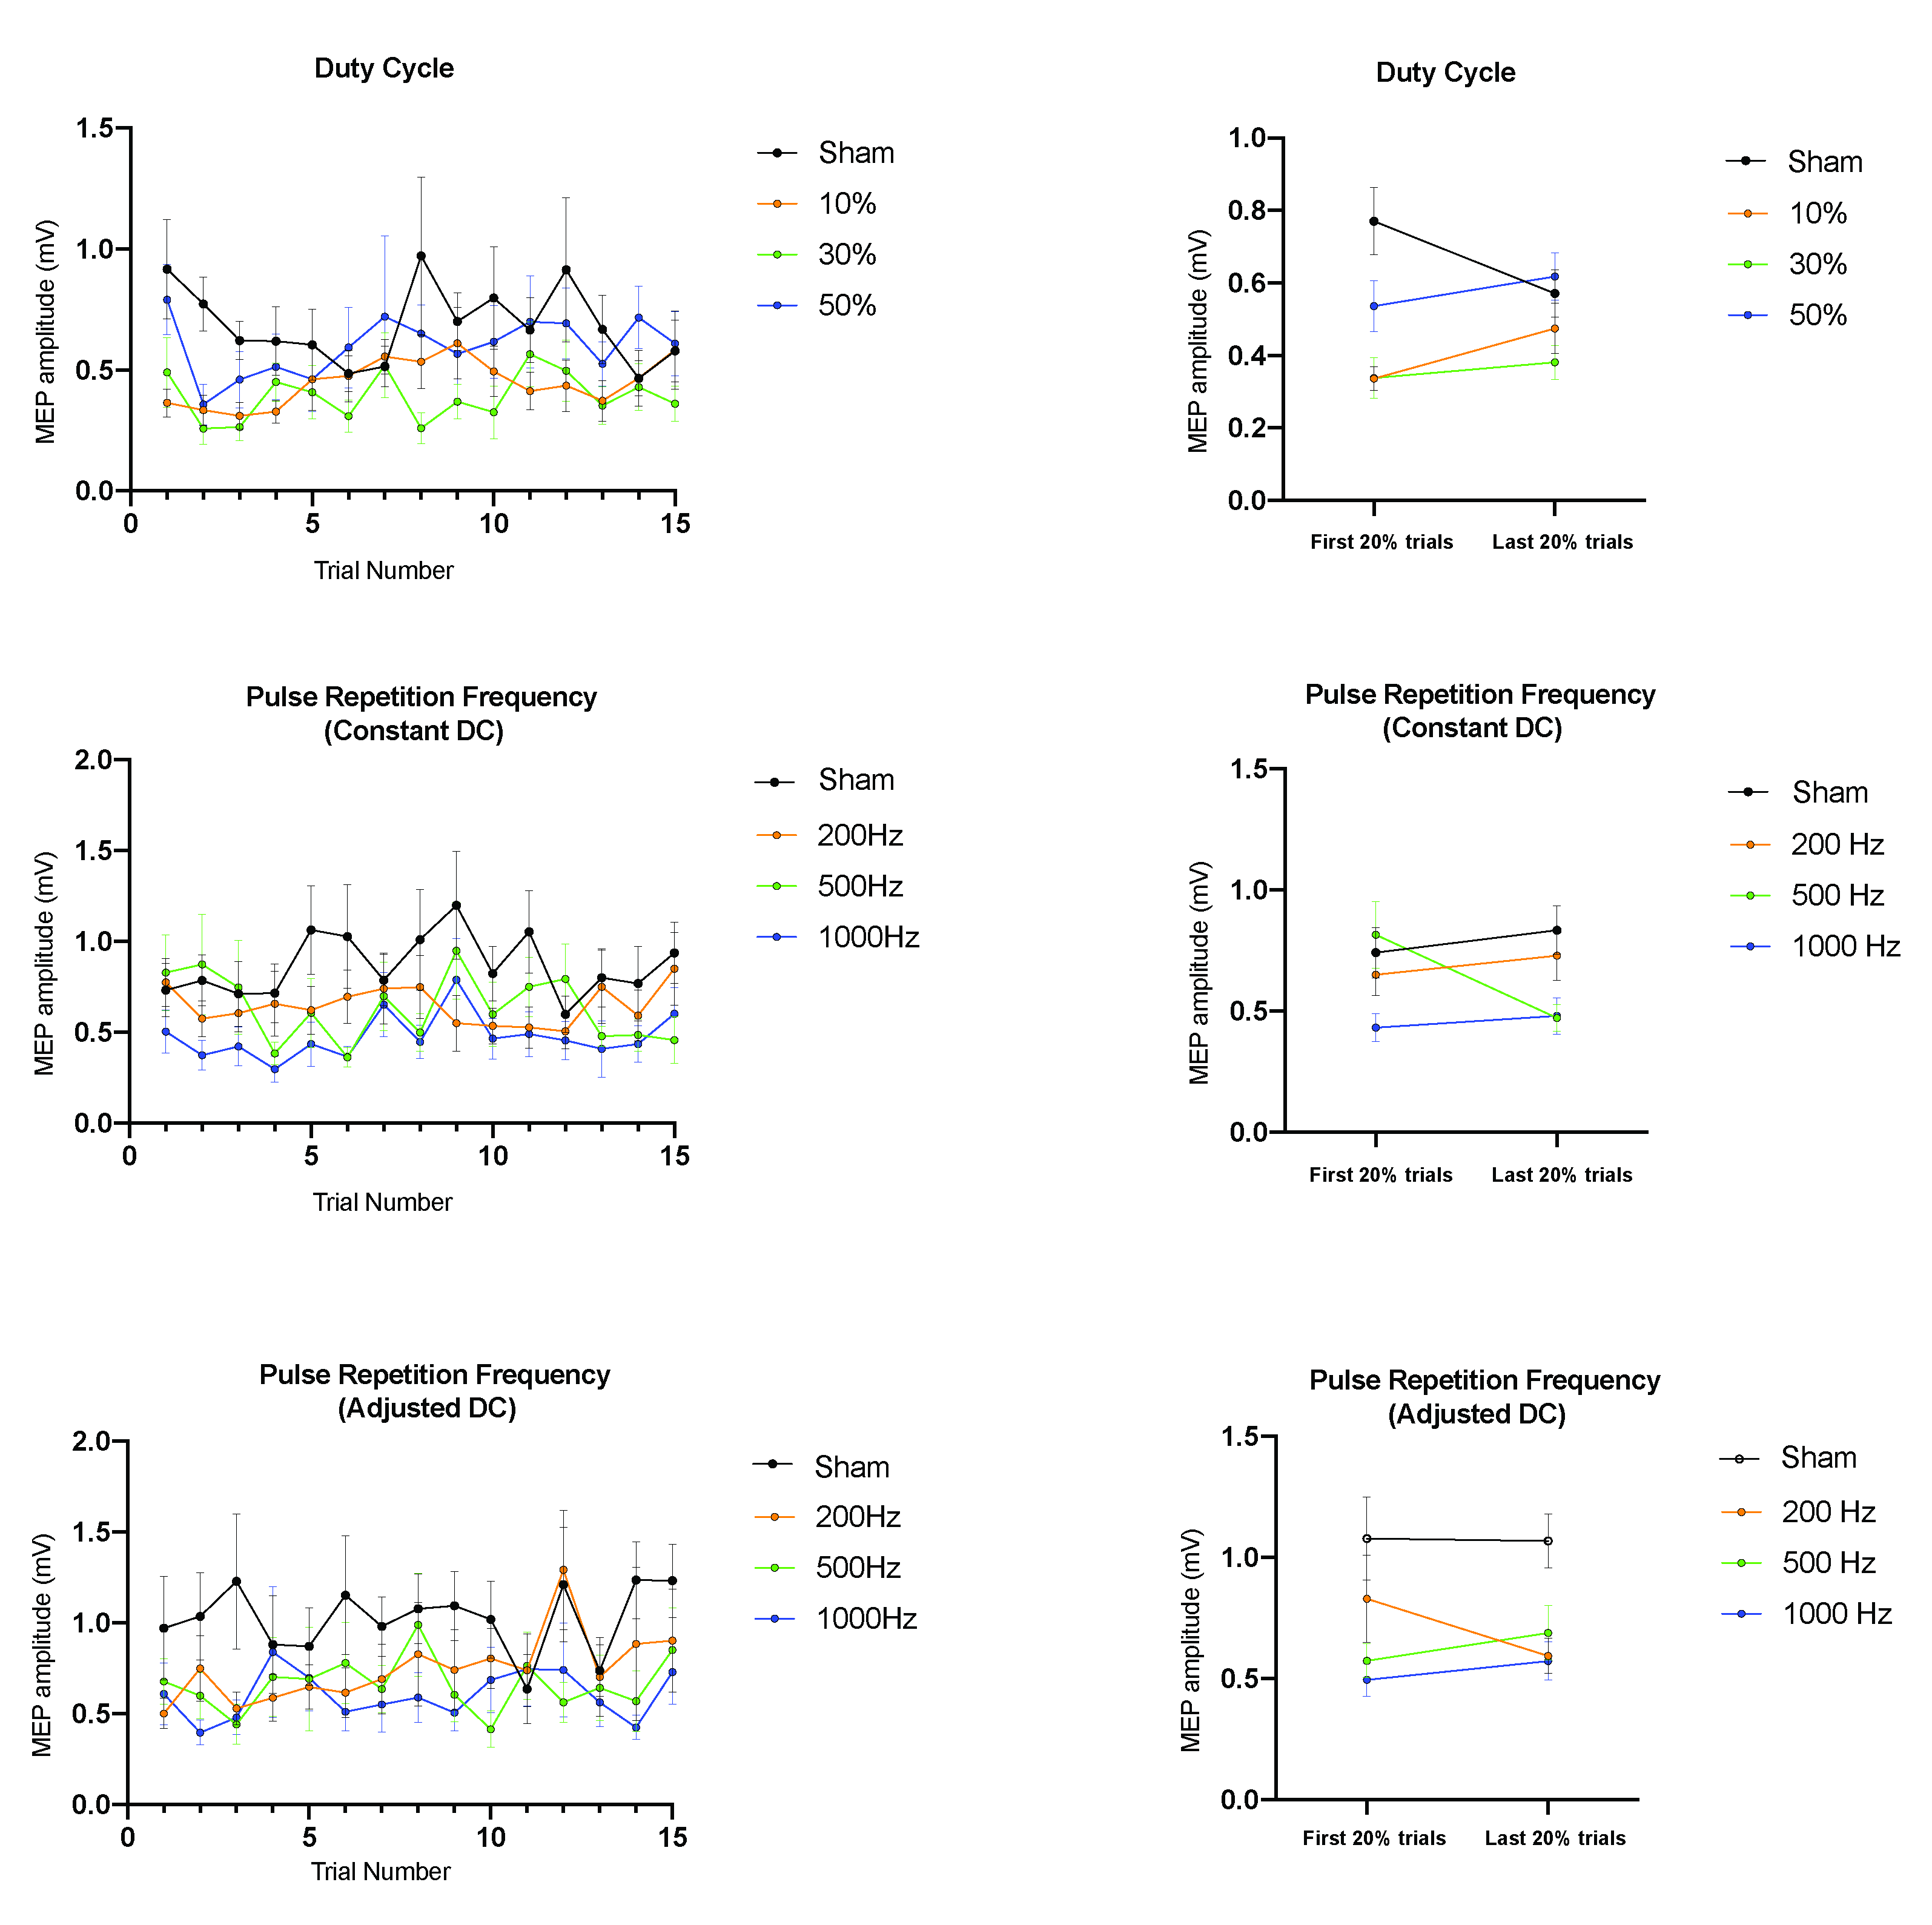

Supplement: supp [file elife-54497-supp-v1.zip › elife_poa_e54497_Figure_5_figure_supplement_2.tif]

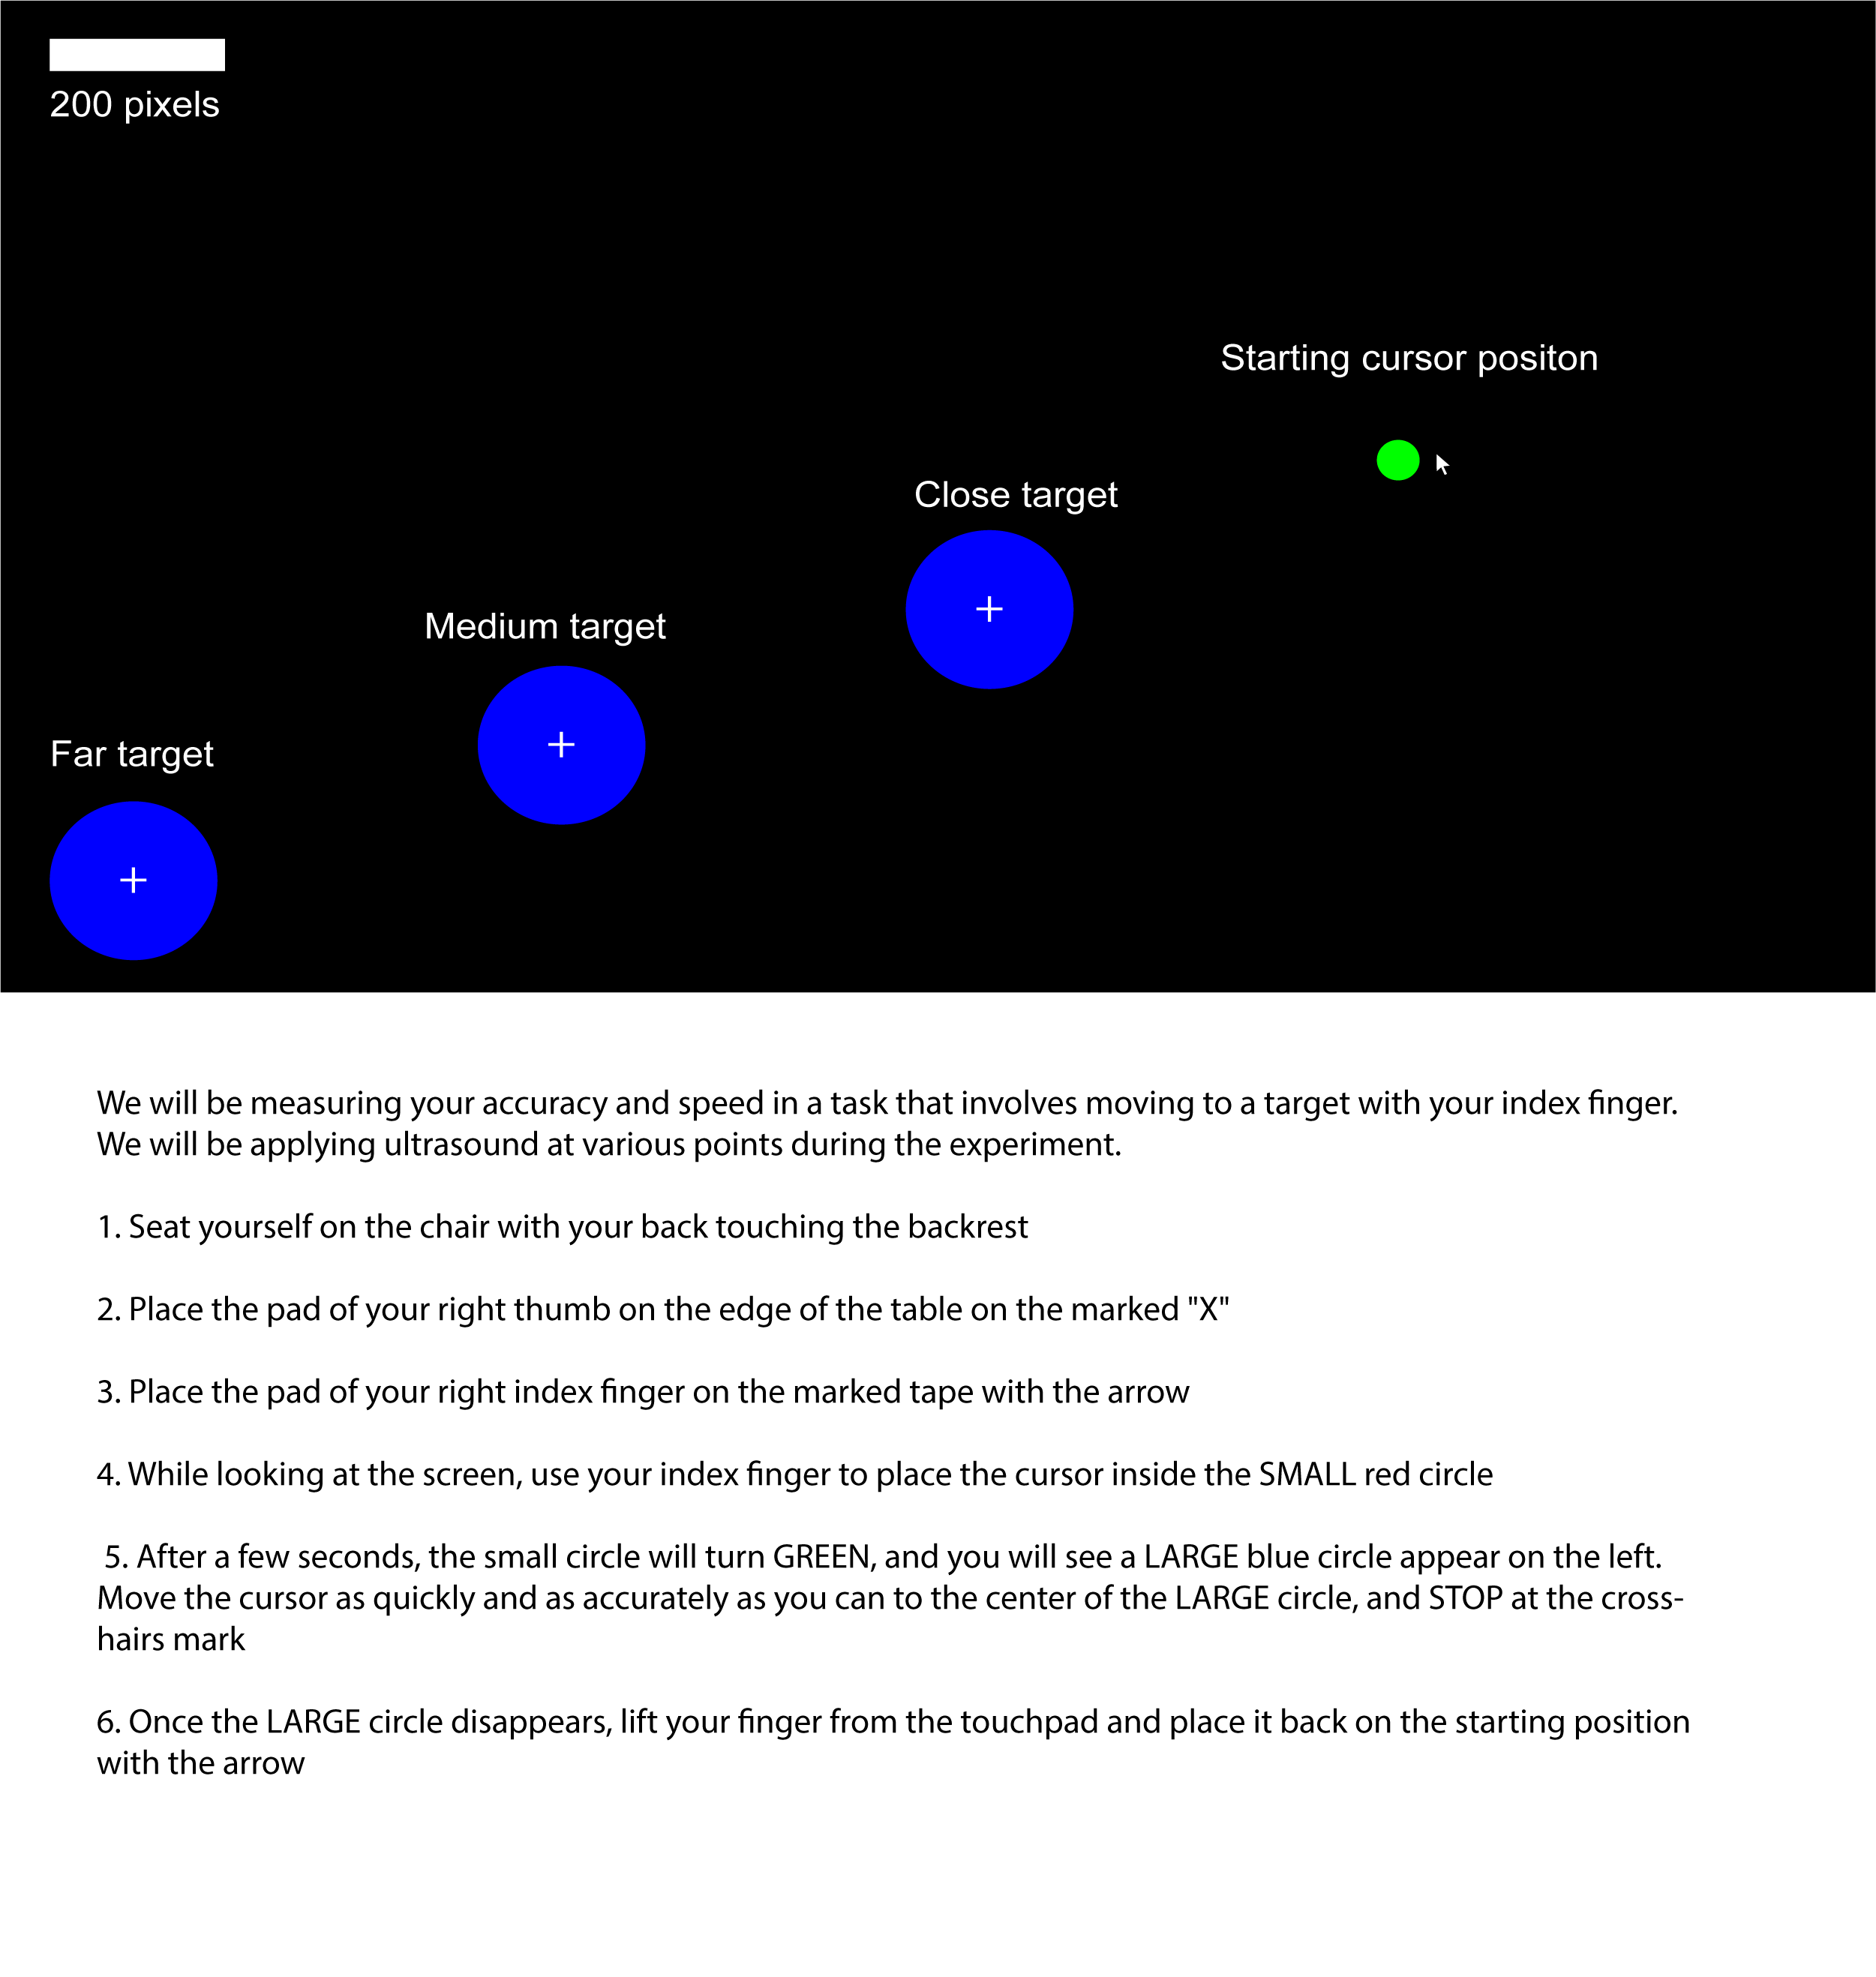

Supplement: supp [file elife-54497-supp-v1.zip › elife_poa_e54497_Figure_8_figure_supplement_1.tif]
